# Supplementary material for: Substitution of Nevirapine, Efavirenz, or Abacavir for Protease Inhibitors in Patients with Human Immunodeficiency Virus Infection
Source: Atypon-hosted journal article supplement (doi:10.1056/nejmoa021589), 2003-09-10
Supplement: nejm_martinez_1036sa1-3.pdf [file nejm_martinez_1036sa1-3.pdf]

# Supplementary Appendix

This appendix has been provided by the authors to give readers additional information about their work.

Supplement to: Martínez E, Arnaiz JA, Podzamczar D, et al. Substitution of Nevirapine, Efavirenz, or Abacavir for Protease Inhibitors in Patients with Human Immunodeficiency Virus Infection. *N Engl J Med* 2003;349:1036-46.

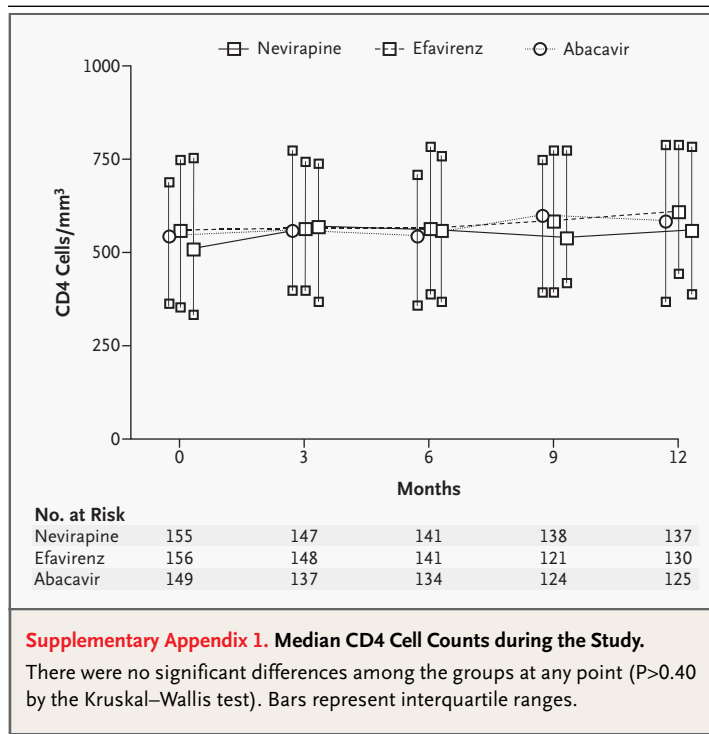

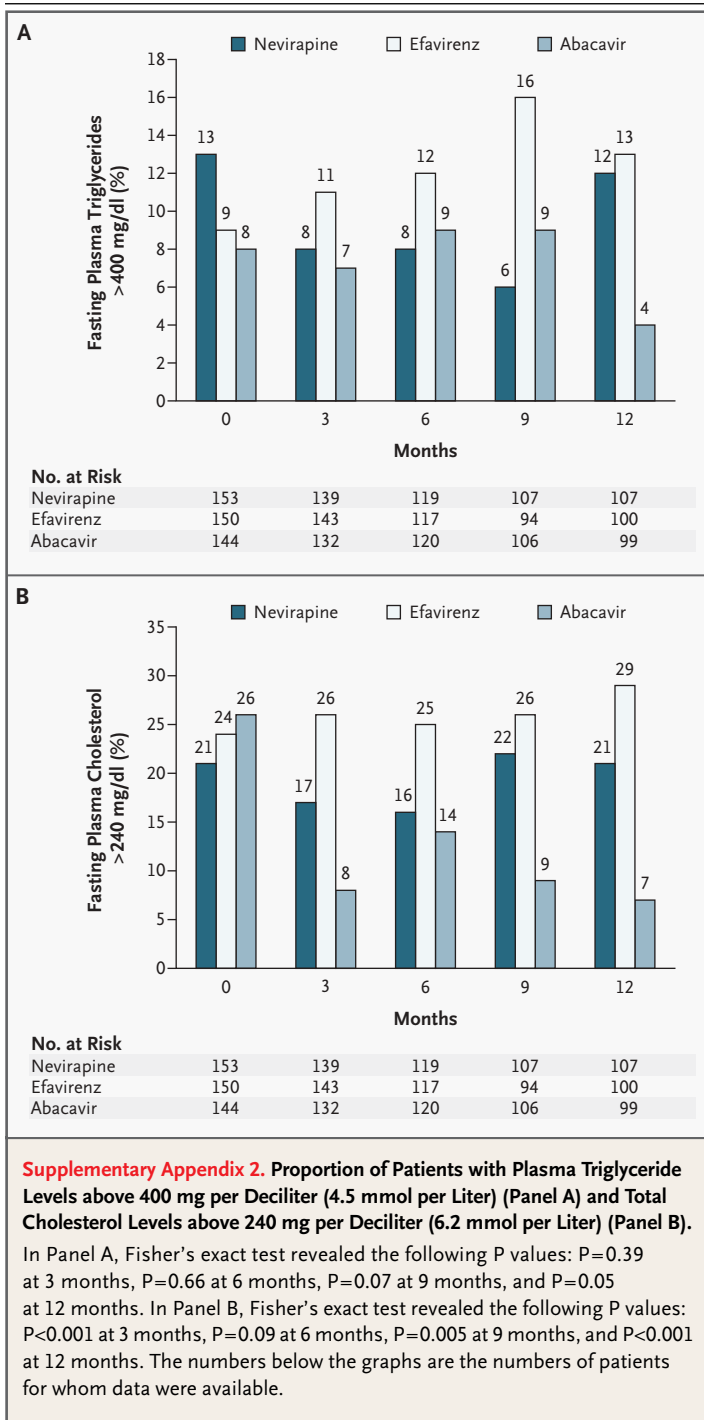

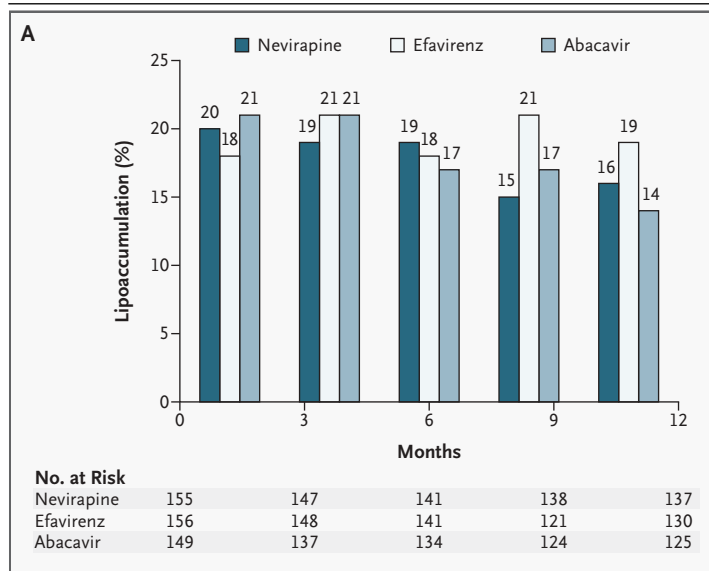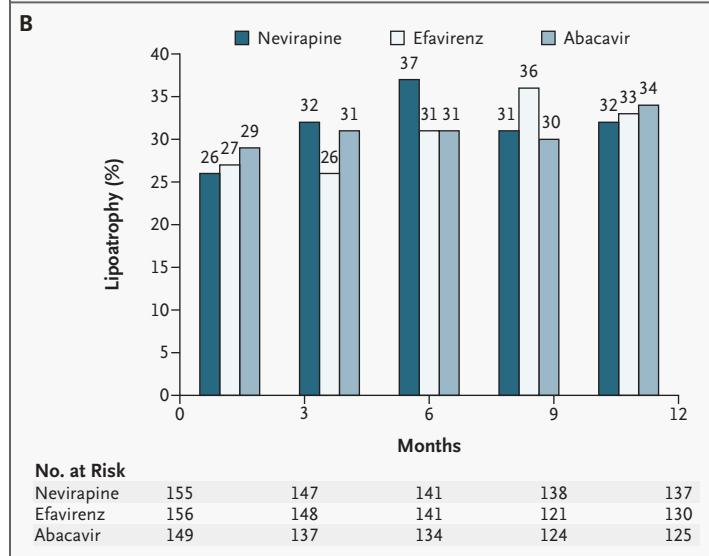

**Supplementary Appendix 3. Proportion of Patients with Moderate or Severe Lipoaccumulation (Panel A) and Moderate or Severe Lipoatrophy (Panel B).**

There were no significant differences among the groups at any point ( $P > 0.50$  by the chi-square test).
